# Supplementary material for: Effects of including the adjoint sea ice rheology on estimating Arctic ocean-sea ice state
Source: Copernicus journal article supplement (doi:10.5194/egusphere-2022-1099), 2022-10-18
Supplement: Supplementary file [file egusphere-2022-1099-RC2-supplement.pdf]

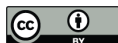

1

2

3

### Effects of including the adjoint sea ice rheology on estimating Arctic ocean-sea ice state

4 Guokun Lyu<sup>1</sup>, Armin Koehl<sup>2</sup>, Xinrong Wu<sup>3</sup>, Meng Zhou<sup>1</sup>, and Detlef Stammer<sup>2</sup>

5 <sup>1</sup>Shanghai Key Laboratory of Polar Life and Environment Sciences, School of Oceanography, Shanghai Jiao Tong  
6 University, Shanghai, China

7 <sup>2</sup>Center for Earth System Research and Sustainability (CEN), University of Hamburg, Hamburg, Germany

8 <sup>3</sup>Key Laboratory of Marine Environmental Information Technology, National Marine Data and Information Service,  
9 Tianjin, China

10 *Correspondence to:* Guokun Lyu (guokun.lyu@sjtu.edu.cn)

11 **Abstract.** The adjoint technique has been applied to the coupled ocean and sea ice models for sensitivity studies and  
12 Arctic state estimation. However, the accuracy of the adjoint model is degraded by simplifications on the adjoint of  
13 the sea ice model, especially adjoint sea ice rheology. As part of ongoing developments of coupled ocean and sea ice  
14 estimation system, we incorporate and stabilize the adjoint of viscous-plastic sea ice dynamics (adjoint-VP) and  
15 compare it with the adjoint of a free drift sea ice model (adjoint-FD) through assimilation experiments. Using the  
16 adjoint-VP resulted in a further cost reduction of 7.9% in comparison to adjoint-FD with noticeable improvements in  
17 ocean temperature over the open water and intermediate layers of the Arctic Ocean. Adjoint-VP more efficiently  
18 adjusts uncertain parameters than adjoint-FD by involving different sea ice retreat processes. For instance, adjoint-  
19 VP melts sea ice up to 1.0 m in the marginal seas from May to June through over-adjusting air temperature (>8 °C); adjoint-  
20 VP reproduces the sea ice retreat with smaller adjustments on the atmospheric state within the prior uncertainty range.  
21 The developments of the adjoint model here lay the foundation for further improving Arctic ocean and sea ice  
22 estimation through comprehensively adjusting the initial conditions, atmosphere forcings, and model parameters.

23

24

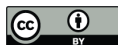

## 25 **1 Introduction**

26 The Arctic Ocean has experienced drastic changes and has been migrating to a new state over the past decades,  
27 concerning the fast declining sea ice (Comiso et al., 2008; Kwok, 2018), increased inventory of freshwater in the  
28 western Arctic (Proshutinsky et al., 2019), enhanced warm inflows from the Pacific Ocean (Woodgate et al., 2012)  
29 and the Atlantic Ocean (Polyakov et al., 2017; Quadfasel et al., 1991), and increased ocean primary productivity  
30 (AMAP, 2021). These changes amplify the local air and ocean temperature and potentially impact the climate and  
31 weather of the Northern Hemisphere (Ma et al., 2022; Overland et al., 2021).

32 Over the recent years, progress has been made in satellite techniques (e.g., Kaleschke et al., 2001; Spreen et al.,  
33 2008), in-situ observations (e.g., Toole et al., 2016; Morison et al., 2007; Polyakov et al., 2017; Proshutinsky et al.,  
34 2009; Schauer et al., 2008), and coupled ocean and sea ice models. However, the lack of extensive Arctic observations,  
35 especially direct observations of the state variables and fluxes through the water column, and deficiencies of the  
36 coupled ocean and sea-ice model still obscure our understanding of the Arctic sea-ice changes and extremes. Accurate  
37 predictions of sea ice is therefore also limited (e.g., Yang et al., 2020).

38 To fill the gaps, research groups have applied data assimilation techniques to ingest available observations into  
39 coupled ocean and sea ice models, reconstructing spatio-temporal changes of the Arctic Ocean. The resulting  
40 reanalyses are assumed to advance in fidelity since the development of models and data assimilation methods progress,  
41 and observation numbers increase, providing invaluable information for understanding the Arctic changes and the  
42 related ocean-atmosphere-ice heat and freshwater fluxes. Among the various data assimilation methods, an adjoint  
43 method with a large assimilation window (years to decades) has been developed within the framework of Estimating  
44 the Circulation and Climate of the Ocean (Heimbach et al., 2019; Stammer et al., 2002; Wunsch and Heimbach, 2007)  
45 to create a dynamically consistent synthesis, permitting closed budget analysis (e.g., Buckley et al., 2014; Piecuch and  
46 Ponte, 2012). Within the assimilation window, the adjoint method attempts to make the model simulation consistent  
47 with available observations iteratively by correcting model uncertain inputs (control variables hereafter), including  
48 initial conditions, atmospheric forcing, and model parameters to yield minimum misfits measured by an objective  
49 function. An adjoint model (adjoint of the tangent linear approximation of the nonlinear model) is used as a spatio-  
50 temporal interpolator to project the model-data misfits onto the gradient of a cost function with respect to the control  
51 variables. Therefore, the accuracy of the adjoint model is crucial for the performance of the minimization and ultimately  
52 the quality of the synthesis.

53 The adjoint method has been applied to the coupled ocean and sea ice system for adjoint sensitivities studies  
54 (Heimbach et al., 2010; Kauker et al., 2009; Koldunov et al., 2013) and Arctic synthesis (Fenty and Heimbach, 2013;  
55 Koldunov et al., 2017; Lyu et al., 2021b; Nguyen et al., 2021). However, due to the persistence of numerically  
56 instability issues, the adjoint of sea ice dynamics is omitted (Forget et al., 2015; Nguyen et al., 2021; Fenty and  
57 Heimbach, 2013; Mazloff et al., 2010) or simplified to a free-drift sea ice model (Koldunov et al., 2017; Lyu et al.,  
58 2021a; Lyu et al., 2021b). Toyoda et al. (2019) described stabilizing the adjoint of full elastic–viscous–plastic sea-ice  
59 dynamics and noted much weaker evolution of sensitivity to sea-ice velocity by  $O(10^2)$  in the central Arctic Ocean  
60 than the adjoint of free-drift sea ice dynamic. Therefore, using the adjoint of a free-drift sea ice dynamic may



61 overestimates the gradients of the cost function towards the sea-ice velocity and wind, which potentially impairs the  
62 usefulness of the adjoint gradients and hinders the minimization of the model-data misfits.

63 In this study, we incorporate and stabilize the adjoint of a viscous-plastic sea ice dynamic (Hibler 1979; Zhang and  
64 Hibler Iii, 1997), building on prior developments of the adjoint method in the Arctic Ocean (Fenty and Heimbach,  
65 2013; Heimbach et al., 2010; Koldunov et al., 2017; Lyu et al., 2021b). Taking the unprecedented sea ice retreat  
66 process in 2012 as an example, we evaluate the impacts of using the adjoint of full sea ice dynamics on estimating the  
67 Arctic ocean and sea ice and sea-ice retreat processes.

68 The paper is organized as follows. In section 2, we introduce the model configurations and assimilation  
69 experiments. We assess the assimilation results in section 3 regarding the residual errors. We examine adjustments of  
70 the control variables in section 4 and compare sea ice retreat process from April 10, 2012 to September 20, 2012 in  
71 section 5. Section 6 summarizes the results of this study.

72

## 73 **2 Model Configuration and Experiment Setups**

### 74 **2.1 The Coupled Ocean-Sea Ice Model and Assimilation System**

75 The data assimilation system is based on the adjoint method in the framework of ECCO, using the Massachusetts  
76 Institute of Technology ocean general circulation model (MITgcm, Marshall et al., 1997) coupled with a zero-layer  
77 dynamic-thermodynamic sea ice model of Hibler (1979). The sea ice dynamics are based on the viscous-plastic  
78 rheology and are solved using a line successive over-relaxation algorithm (Zhang and Rothrock, 2000) and are  
79 modified to facilitate the generation of adjoint model (Losch et al., 2010). The adjoint of the coupled ocean and sea  
80 ice model is generated by the Transformation of Algorithms in FORTRAN (TAF, Giering and Kaminski, 1998).

81 The pan-Arctic model covers the Arctic Ocean north of the Bering Strait and the Atlantic Ocean 44° N (Figure  
82 1). In the horizontal, we use a curvilinear grid with a resolution of 12~15 km in the Arctic Ocean and ~18 km in the  
83 north Atlantic Ocean. In the vertical, the system has 50 z-levels ranging from 10 m at the surface to 456 m in the deep  
84 ocean. The open boundaries are provided by a 16 km Atlantic-Arctic Ocean simulation (Serra et al., 2010). At the  
85 ocean surface, we use the atmosphere state from the National Centers for Environmental Prediction reanalysis 1  
86 (NCEP-RA1, Kalnay et al., 1996) and bulk formulae to compute the momentum, heat, and freshwater fluxes. A virtual  
87 salt flux parameterization simulates the dilution and salinification of rainfall, evaporation, and river runoff. The river  
88 runoff is applied near the river mouth with seasonal-varying discharge (Fekete et al., 2002). Besides, the unresolved  
89 vertical mixing is parameterized using the K-Profile scheme of Large et al. (1994). The bottom topography is derived  
90 from ETOPO2 (Smith and Sandwell, 1997).

91 The adjoint method brings the model simulation close to available observations by iteratively adjusting control  
92 variables to minimize a quadric target function  $J$  (cost function hereafter):

$$93 J(C_{ini}, C_{atm}(t)) = \sum_{t=1}^{T_1} [y(t) - E(t)x(t)]^T R^{-2} [y(t) - E(t)x(t)] + C_{ini}^T P^{-2} C_{ini} + \sum_{t=0}^{T_1} C_{atm}(t)^T Q_a^{-2} C_{atm}(t) \quad (1).$$

94

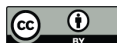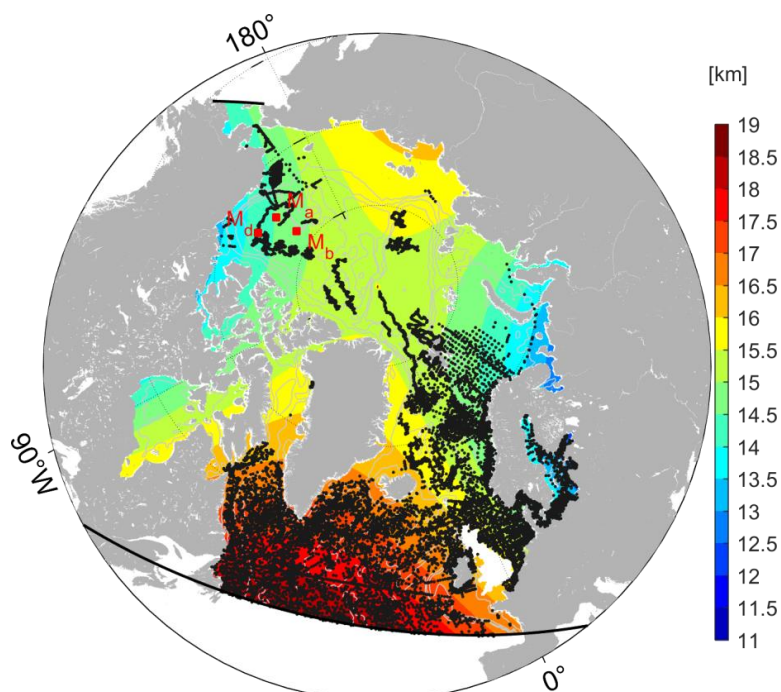

95 Figure 1. Model domain (enclosed by the black lines) and horizontal resolutions (shading). The black dots represent  
 96 profile observations from EN4 datasets (Good et al., 2013), and the red rectangles show the three moorings from the  
 97 Beaufort Gyre Exploration Project (BGEP).  
 98  
 99

100 With an assimilation window of one year (2012), the control variables consist of the initial condition ( $C_{ini}$ ),  
 101 including temperature, salinity, ice effective thickness, sea ice concentration, and daily atmosphere state on the model  
 102 grid ( $C_{atm}(t)$ ), which includes 10-m wind vectors, 2-m air temperature, 2-m specific humidity, precipitation,  
 103 downwelling longwave, and net shortwave radiation. Overall, a total number of  $\sim 2.7 \times 10^8$  variables are adjusted.

104 On the right hand of Equation (1), the first term measures the model-data misfits weighted by the inverse error  
 105 covariance matrices ( $R^{-2}$ ). The following section will introduce the available measurements and their uncertainties ( $R$ ).  
 106  $y(t)$  and  $x(t)$  are observations and the model state at time  $t$ , respectively.  $E(t)$  maps the model state  $x(t)$  to the  
 107 corresponding observations  $y(t)$ . The last two terms are background terms of the initial condition ( $C_{ini}$ ) and the time-  
 108 varying atmospheric forcing ( $C_{atm}(t)$ ) weighted by their inverse error covariance matrices ( $P^{-2}$  and  $Q^{-2}$ , respectively),  
 109 which penalize their adjustments and provide complete information on the controls. Following Lyu et al. (2021b),  
 110 prior uncertainties of the time-varying atmosphere state ( $Q_a$ ) depend on geographic locations. They are computed as  
 111 the variance of the nonseasonal variability of the corresponding variables using the NCEP-RA1.

112 During the optimization process, the adjoint of the coupled ocean-ice model is used to compute the gradients of  
 113 the cost function  $J$  to the control variables, and a quasi-Newton algorithm (Gilbert and Lemaréchal, 2006) is used to  
 114 reduce the cost function  $J$  iteratively. The optimization process continues until the cost function cannot be further  
 115 reduced.



## 116 2.2 Observations and Prior Uncertainties

117 Both satellite and in-situ measurements (Table 1) are used to constrain the model simulations. In addition, sea  
 118 ice draft measurements by up-looking sonar from the Beaufort Gyre Exploration Project (see Figure 1 for the locations)  
 119 are used to validate the assimilation results independently.

120 Prior uncertainties follow our previous Arctic-focused synthesis study (Lyu et al., 2021b). Uncertainties of  
 121 temperature and salinity depend on the depth and are set to  $0.6^\circ$  C and 0.3 PSU at the surface and  $0.02^\circ$  C and 0.02  
 122 PSU in the deep ocean; SIC uncertainties consist of representation errors (15% within 50 km from the coastlines and  
 123 10% over the open water) and instrument errors. Because of higher errors in low SIC and lower errors over open water,  
 124 we modify the representation uncertainties by multiplicative factors of 0.85, 1.20, 1.10, and 1.00 for the observed SIC  
 125 ranges of 0.00, <15%, 15%–25%, and 0.25%, respectively.

126 SIT errors are provided by the datasets and interpolated to our model grid. SLA uncertainties are set to 3.0 cm.  
 127 Sea ice drift uncertainties are dominated by representation errors and are set to 0.04 m/s. In addition, we reduce the  
 128 weight of the temperature and salinity climatology (WOA18) cost component by a factor of 20 and 10 to avoid  
 129 overfitting to the climatology.

130 **Table 1.** Assimilated measurements.

| Date sets               | Resolution | Source                                                                                                                                                                                            |
|-------------------------|------------|---------------------------------------------------------------------------------------------------------------------------------------------------------------------------------------------------|
| sea level anomaly       | 7 km       | Copernicus Marine Environment Monitoring Service,<br><a href="http://marine.copernicus.eu">http://marine.copernicus.eu</a>                                                                        |
| Sea surface temperature | 25km       | Remote Sensing System, <a href="http://www.remss.com/measurements/sea-surface-temperature/">http://www.remss.com/measurements/sea-surface-temperature/</a>                                        |
| T&S profiles            | –          | Good et al. (2013), <a href="https://www.metoffice.gov.uk/hadobs/en4/">https://www.metoffice.gov.uk/hadobs/en4/</a>                                                                               |
| Sea ice concentration   | 25km       | Kaleschke et al. (2001) and Spreen et al. (2008), SSMI(2011-2012),<br><a href="http://icdc.cen.uni-hamburg.de/1/daten/cryosphere.html">http://icdc.cen.uni-hamburg.de/1/daten/cryosphere.html</a> |
| Sea ice thickness       | 25km       | (Ricker et al., 2017),<br><a href="https://spaces.awi.de/pages/viewpage.action?pageId=291898639">https://spaces.awi.de/pages/viewpage.action?pageId=291898639</a>                                 |
| Sea ice drift           | 62.5km     | (Lavergne et al., 2019), <a href="https://osi-saf.eumetsat.int/products/osi-405-c">https://osi-saf.eumetsat.int/products/osi-405-c</a>                                                            |
| WOA18                   | 1°         | Zweng et al. (2018),<br><a href="https://www.nodc.noaa.gov/OC5/woa18/woa18data.html">https://www.nodc.noaa.gov/OC5/woa18/woa18data.html</a>                                                       |

## 131 2.3 Viscos-Plastic Sea Ice Dynamics and Its Adjoint

132 In the coupled ocean-sea ice model, the following equation governs ice motions:

$$133 \quad m \frac{d\vec{u}}{dt} = -mf\vec{k} \times \vec{u} + \tau_{air} + \tau_{ocn} - \nabla\phi(0) + \nabla \cdot \sigma \quad (2)$$

134 where  $m$  is ice mass and  $\vec{u}$  is ice motion vectors;  $\tau_{air}$  and  $\tau_{ocn}$  are the wind and ocean drags;  $-\nabla\phi(0)$  is the tilt of  
 135 the sea surface; and  $\nabla \cdot \sigma$  is the divergence of the ice stress tensor  $\sigma_{ij}$  ( $i=1,2$ ), representing the internal forces of sea  
 136 ice.

137 In the viscous-plastic rheology of Hibler (1979), the stress tensor  $\sigma_{ij}$  is related to ice strain rate ( $\epsilon_{ij}$ ) and  
 138 strength ( $P$ ):

$$139 \quad \sigma_{ij} = 2\eta(\epsilon_{ij}, P)\epsilon_{ij} + [\zeta(\epsilon_{ij}, P) - \eta(\epsilon_{ij}, P)]\epsilon_{ij}\delta_{ij} - \frac{P}{2}\delta_{ij} \quad (3)$$

140 where  $\delta_{ij}$  is the Kronecker delta ( $\delta_{ij} = 1$  if  $i=j$ , otherwise 0).  $\eta$  and  $\zeta$  are the bulk and shear viscosities, expressed  
 141 as:

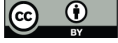

142 
$$\zeta = \frac{P}{2\Delta_{reg}} \quad (4)$$

143 
$$\eta = \frac{P}{2e^2\Delta_{reg}} \quad (5)$$

144 where

145 
$$\Delta = [(\epsilon_{11}^2 + \epsilon_{22}^2)(1 + e^{-2}) + 2(1 - e^{-2})\epsilon_{11}\epsilon_{22} + 4e^{-2}\epsilon_{12}^2]^{\frac{1}{2}} \quad (6)$$

146  $e$  is the ratio of normal stress to shear stress and is set to 2.0;  $\Delta_{reg} = \max(\Delta, \Delta_{min})$  with  $\Delta_{min}$  equals  $1.0 \times 10^{-10}$ . Sea

147 ice strain rate is computed as:

148 
$$\epsilon_{ij} = \frac{1}{2} \left( \frac{\partial u_i}{\partial x_j} + \frac{\partial u_j}{\partial x_i} \right) \quad (7)$$

149 The ice strength  $P$  depends on sea ice effective thickness ( $H$ ) and concentration ( $C$ ):

150 
$$P = P^*H \cdot \exp(-C^* \cdot (1 - C)) \quad (8)$$

151  $P^*$  and  $C^*$  are the ice compressive strength constant and ice strength decay constant and are set to  $2.75 \times 10^4 \text{ N m}^{-2}$

152 and -20.0.

153 The dependence of the internal force term ( $\nabla \cdot \sigma$ ) on ice velocity is strongly nonlinear, leading to an unstable  
154 adjoint of the coupled ocean-sea ice system. Therefore, previous studies (Koldunov et al., 2017; Lyu et al., 2021b)  
155 used an adjoint of a free drift sea ice model (without adjoint of  $\nabla \cdot \sigma$ ). Toyoda et al. (2019) pointed out that the full  
156 adjoint of Equation (2) can be stabilized by eliminating the dependence of bulk and shear viscosities on strain rate  
157 ( $\epsilon_{ij}$ ).

158 Following the study of Toyoda et al. (2019), we eliminate the dependence of bulk and shear viscosities on  $\epsilon_{ij}$  in  
159 the adjoint of Equation (2). Besides, we note that there are still strong sensitivities which hamper the convergence of  
160 optimization. We set the adjoint sensitivities of ice velocity to zero if the local sensitivity is 50 times larger than the  
161 global mean of their absolute values. The other modifications on the adjoint model are the same as in Lyu et al. (2021b).

162 Based on the adjoint of a free-drift sea ice model (adjoint-FD hereafter) and the viscous-plastic sea ice dynamics  
163 (adjoint-VP hereafter), we compute over the period January 1 to 31 January 31, 2012 sensitivities of domain-integrated  
164 sea ice volume with respect to the atmospheric forcings and the initial conditions. Similar to Toyoda et al. (2019),  
165 adjoint-FD shows much stronger sensitivities to wind than adjoint-VP (Figure 2a, b) in the central Arctic Ocean. Along  
166 the SIEs of the Atlantic sectors, adjoint-VP reveals that the towards-ice wind anomalies increase total sea ice (Figure  
167 2b) since they prevent ice from drifting to the warm Atlantic water. However, adjoint-FD shows strong sensitivities  
168 along the SIE of the Atlantic sectors, but both towards-ice and off-ice wind anomalies appear, potentially resulting in  
169 ice convergence.

170 Furthermore, we add daily wind perturbations, computed by scaling the adjoint sensitivities (Figure 2a, b) that  
171 the maximum perturbations are  $1.0 \text{ m s}^{-1}$ , to the 6-hourly wind from NCEP-RA1 and examine their impacts on sea ice  
172 changes. As expected, sea ice effective thickness (Figure 2c, d) changes are mainly along the SIEs in the Atlantic  
173 sectors, and wind perturbations from adjoint-FD lead to negative effective changes northeast of Greenland. In the  
174 central Arctic Ocean with compact ice, the internal forces  $\nabla \cdot \sigma$  contradicts the impacts of wind perturbations.  
175 Therefore, despite the strong adjoint sensitivities to the wind in adjoint-FD, we note that the resulting wind



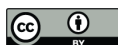

176 perturbations change effective thickness only slightly (Figure 2c), which is comparable to that in adjoint-VP (Figure  
177 2d).

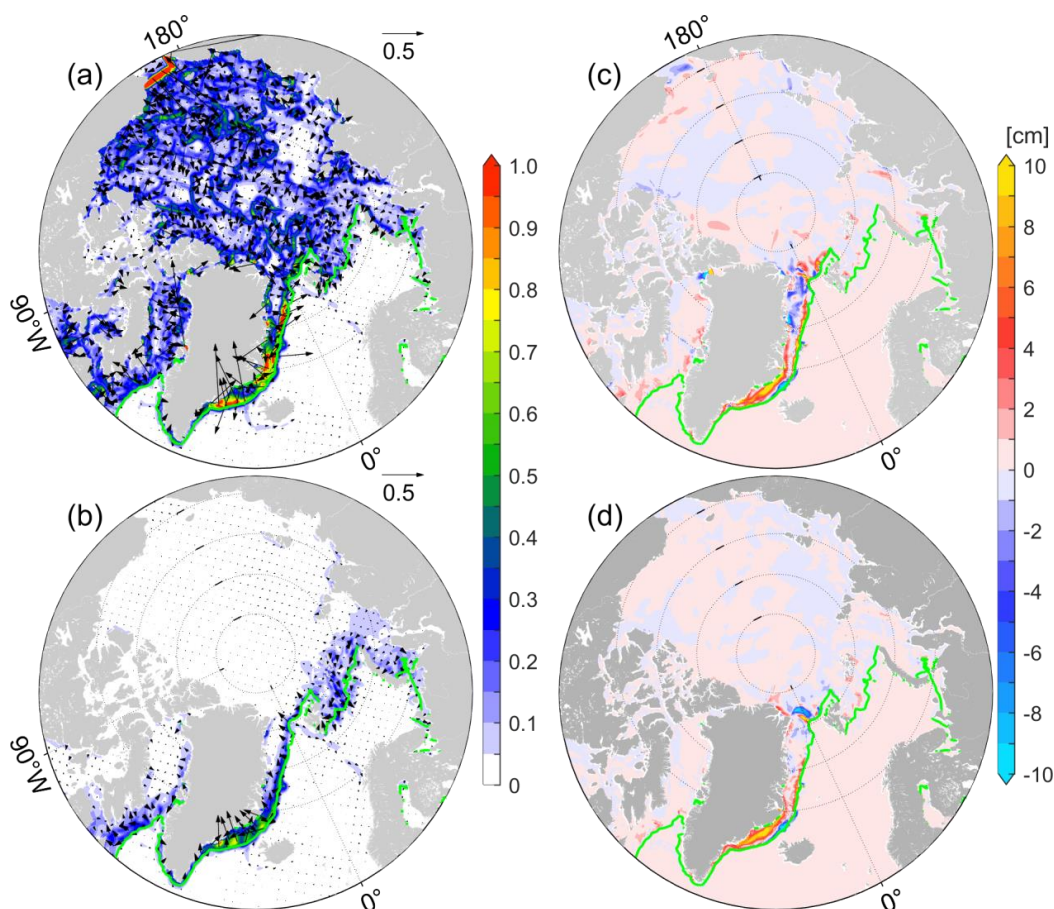

178  
179 Figure 2. Sensitivities of total sea ice volume to wind vectors (in  $0.1 \times \text{km}^3 (\text{m s}^{-1})^{-1}$ , shadings for amplitudes) using the  
180 adjoint of (a) a free-drift sea ice dynamic and (b) full viscous-plastic sea ice dynamics with modifications in section  
181 2.3. Panels (c)-(d) are the mean effective thickness changes by perturbing the wind with the corresponding adjoint  
182 sensitivities multiplied by a factor of  $10^{-8}$ . The green lines are the SIE in January 2012.  
183

184 Besides overestimating the sensitivities to wind, adjoint-FD may also degrade the usefulness of the adjoint  
185 sensitivities in optimization. Therefore, we perform two assimilation experiments to comprehensively evaluate the  
186 impacts of including the adjoint of sea ice rheology on ocean and sea ice estimation.

### 187 3 Model-Data Misfits Reductions and Residuals

#### 188 3.1 Evaluation of the Optimization

189 In adjoint-FD and adjoint-VP, 13 and 32 iterations were performed before the cost function could not be further  
190 reduced, resulting in an overall cost reduction of 32.3% and 40.2% (see Table 2 for details), respectively. Of the  
191 individual cost constituents, satellite-observed SST and SIC contribute to  $\sim 25.3\%$  and  $39.7\%$  of the total cost, which



192 are reduced significantly after optimization. The cost of temperature ( $J_{profile\_T}$ ) and salinity ( $J_{profile\_S}$ ) profiles are also  
 193 considerably reduced, especially in the adjoint-VP experiment. The rest of the cost constituents are also brought down  
 194 slightly. Overall, including the adjoint of sea ice rheology further reduces the total cost by 7.9% and individual cost  
 195 constituents, especially  $J_{Sst}$ ,  $J_{profile\_T}$  and  $J_{profile\_S}$ . Based on iterations 0, 13 in adjoint-FD, and 32 in adjoint-VP of the  
 196 optimization, we will focus on the sea ice state and ocean temperature to evaluate the impacts of using the adjoint of  
 197 full sea ice dynamics.

198 **Table 2.** Normalized costs and reductions in the two optimization runs.

| Cost constituent | Control run         | Adjoint-FD          |                          | Adjoint_VP          |                          |
|------------------|---------------------|---------------------|--------------------------|---------------------|--------------------------|
|                  | Normalized cost (%) | Normalized cost (%) | Percentage reduction (%) | Normalized cost (%) | Percentage reduction (%) |
| $J_{Total}$      | 100                 | 67.7                | 32.3                     | 59.8                | 40.2                     |
| $J_{SLA}$        | 2.2                 | 2.1                 | 4.6                      | 2.1                 | 4.6                      |
| $J_{SST}$        | 25.3                | 15.4                | 39.1                     | 12.9                | 49.0                     |
| $J_{profile\_T}$ | 6.9                 | 6.5                 | 5.8                      | 4.3                 | 37.7                     |
| $J_{profile\_S}$ | 5.8                 | 5.9                 | -1.7                     | 4.5                 | 22.4                     |
| $J_{SIC}$        | 39.7                | 18.4                | 53.7                     | 18.1                | 54.4                     |
| $J_{SIT}$        | 3.6                 | 3.1                 | 13.9                     | 2.7                 | 25.0                     |
| $J_{SID}$        | 4.5                 | 4.4                 | 2.2                      | 4.3                 | 4.4                      |
| $J_{WOA\_T}$     | 6.6                 | 6.6                 | 0.0                      | 6.2                 | 6.1                      |
| $J_{WOA\_S}$     | 5.4                 | 5.3                 | 1.9                      | 4.7                 | 13.0                     |

199

200 **3.2 Sea Ice State**

201 **3.2.1 Residual Errors of SIC and SIT**

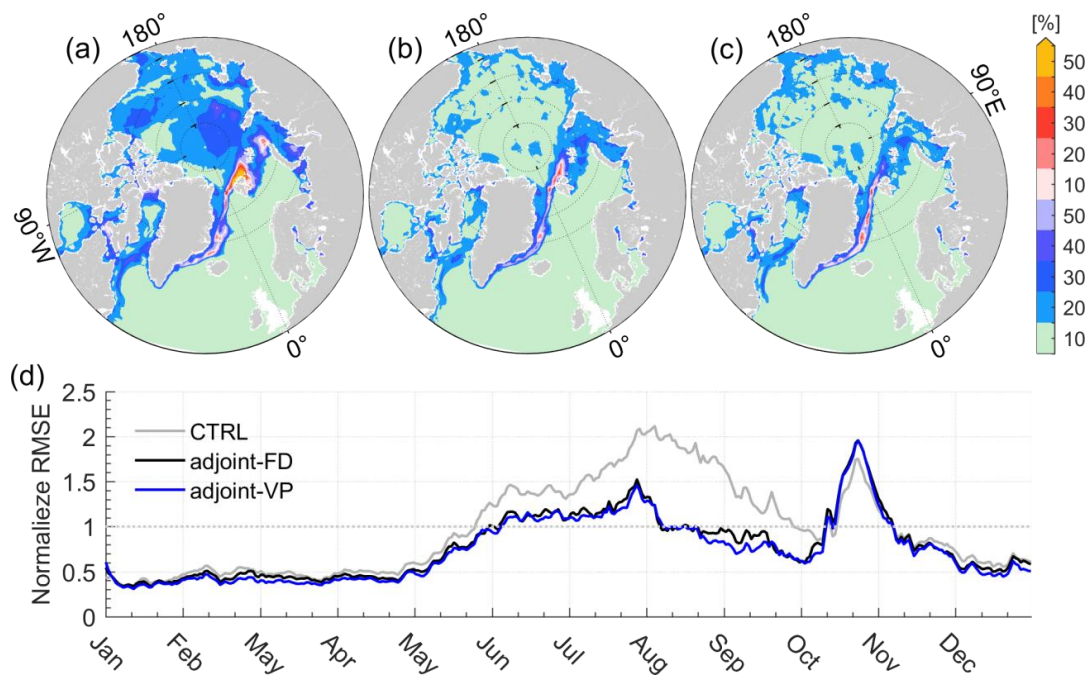

202



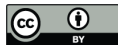

203 Figure 3. Root mean square errors (RMSEs) of SIC between the satellite measurements and (a) the control run, (b)  
204 adjoint-FD, and (c) adjoint-VP, respectively. Panel (d) shows the temporal variations of RMSEs in the three  
205 simulations.

206  
207 Satellite visual, infrared, and microwave technologies have been applied to monitor SIC with high frequencies  
208 and quality, which is of high priority in the global and Arctic-focused synthesis (Chevallier et al., 2017; Uotila et al.,  
209 2019). Previous studies (Fenty and Heimbach, 2013; Lyu et al., 2021a; Lyu et al., 2021b) indicated that SIC could be  
210 improved significantly by adjusting the atmospheric forcings slightly. Here, we explore the residual errors in the  
211 optimization runs.

212 The root mean square errors (RMSEs) of SIC averaged over 2012 (Figure 3a-c) and normalized by the prior  
213 errors and averaged over the model domain (Figure 3d) show the geographical distribution and temporal evolution of  
214 SIC errors, respectively. The normalized RMSEs should be close to 1.0 if the optimization found a model simulation  
215 consistent with the observations and the prior uncertainties.

216 The control run (Figure 3a) shows pronounced RMSEs in the Beaufort Gyre (~15%), the central Eurasian Basin  
217 (15%~20%), the marginal seas (15%~20%), and sea ice extent regions of the Atlantic sector (30%-50%). The  
218 normalized RMSEs reveal that SIC errors remain small (~0.5) and grow quickly from May-September when the sea  
219 ice melts (Figure 3d). Normalized RMSEs up to 1.5 are observed in October, but quickly drop in November (Figure  
220 3d).

221 Both assimilation experiments reduce the SIC errors to less than 5% in the central Arctic Ocean and 10% in the  
222 marginal seas. SIC errors up to 20% exist in the Atlantic sector, where sea-ice shows strong nonlinearity and the  
223 tangent linear model could only capture part of the sea-ice changes (Appendix B in Lyu et al., 2021a). Normalized  
224 SIC errors from May to September have also been reduced close to 1.0 by assimilation of the daily SIC observations  
225 (Figure 3d). However, SIC errors in October remain significant (Figure 3d) since the observed sea ice recovered much  
226 faster than in the three simulations (not shown here). This delayed sea ice recovery in the model may related to model  
227 uncertain parameters, such as demarcation thickness between thin and  
228 thick ice which decides the initial sea ice thickness formed in open water.

229 The control run shows sea ice thickness errors up to 1.0 m in regions north and south of the Fram Strait and  
230 around 0.4~0.7 m in the Beaufort Gyre. In the Beaufort Gyre, the SIT errors are reduced to less than 0.3 m in adjoint-  
231 VP (Figure 4c) and around 0.3-0.5 m in adjoint-FD (Figure 4b). Similar to SIC errors, SIT errors up to 1.0 m remain  
232 along the East Greenland Current, which seems to increase in the two assimilation experiments. The temporal  
233 evolutions of normalized RMSEs show that SIT errors grow quickly from February to April (Figure 4d). Both  
234 assimilation experiments bring down the SIT errors, especially in adjoint-VP from January to April (Figure 4d).  
235 However, the normalized RMSEs of SIT averaged over the model domain remain smaller than 1.0 and seem to grow  
236 larger during the melting season, indicating that the prescribed constant error is not entirely appropriate. More accurate  
237 SIT observations (e.g., halve the uncertainties) and SIT observations during the melting season are required to facilitate  
238 a significant impact on the solution.

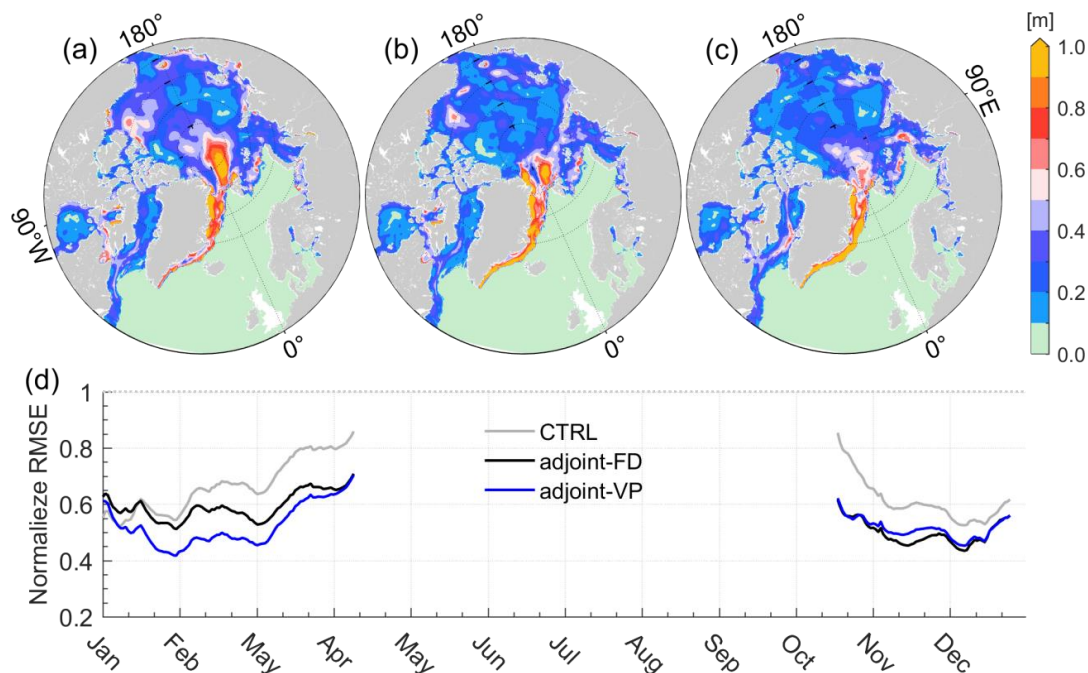

239

240 Figure 4. Root mean square errors (RMSEs) of SIT between the satellite measurements and (a) the control run, (b)  
 241 adjoint-FD, and (c) adjoint-VP. Panel (d) shows the temporal variations of RMSEs in the three simulations.  
 242

### 243 3.2.2 The BGEP Mooring Measurements

244 Independent sea ice draft measured by up-looking-sonar (ULS) from BGEP moorings ( $M_a$ ,  $M_b$ , and  $M_d$  in  
 245 Figure 1) is used to validate the simulated sea-ice draft. The simulated snow depth ( $d_{snow}$ ) and SIT ( $d_{SIT}$ ) are used to  
 246 compute the sea ice draft following Tilling et al. (2018):

$$247 \text{draft} = \frac{\rho_i \times d_{SIT} + \rho_s \times d_{snow}}{\rho_w} \quad (9)$$

248 where  $\rho_i$ ,  $\rho_s$ ,  $\rho_w$  are the density of sea-ice, snow, and water and are set to 910.0, 330.0, and 1027.5 kg m<sup>-3</sup> as in our  
 249 model.

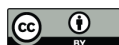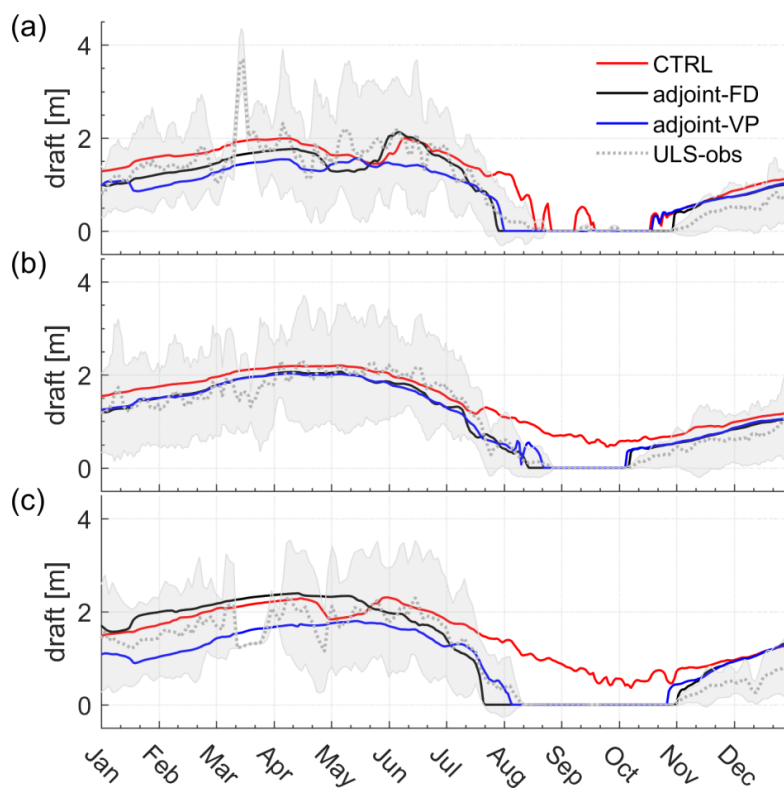

250

251 Figure 5. Daily time series of sea ice draft (grey lines) and the daily standard deviation (shadings) at the mooring  
 252 locations (a)  $M_a$ , (b)  $M_b$ , and (c)  $M_d$  compared with the three model runs (see the legends). ULS-observed sea ice  
 253 draft is smoothed with 5-days running average.

254

### 255 3.3 Ocean Temperature

256 Ocean temperature changes are closely related to sea ice changes. Adjoint-VP introduces more pronounced ocean  
 257 temperature changes than adjoint-FD. Here, we explore ocean temperature changes after assimilation.

258 Temperature profiles in the Arctic Ocean are much less than in the North Atlantic Ocean (black dots in Figure  
 259 1). In the Arctic Ocean, adjoint-FD only reduces temperature errors over the top 20 m, while adjoint-VP reduces  
 260 temperature errors up to  $0.4^\circ\text{C}$  over the top 1000 m (Figure 6a). In the North Atlantic Ocean, adjoint-VP results in  
 261 more pronounced RMSEs reduction up to  $0.3^\circ\text{C}$  than adjoint-FD (Figure 6b).

262

263

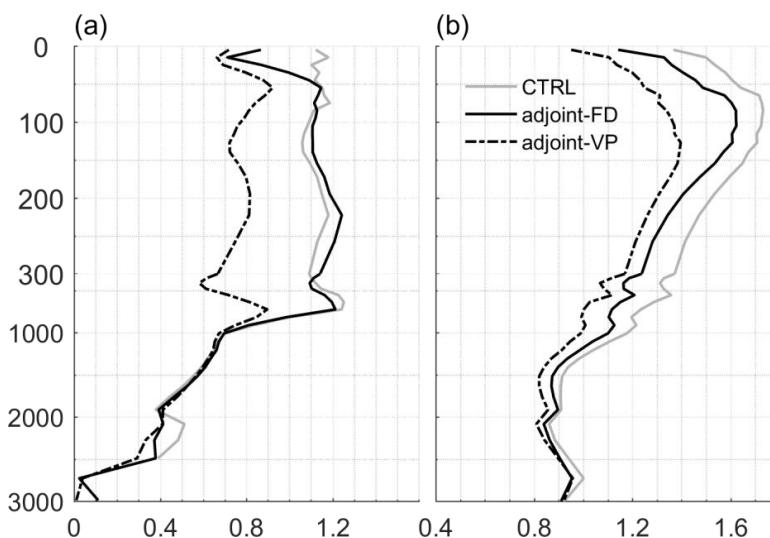

264 Figure 6. Root mean squares errors of potential temperature (a) in the Arctic Ocean and (b) the North Atlantic Ocean  
265 in the three runs.  
266  
267

268 Relative temperature error reductions over the top 50 m reveal an overall improvement of temperature with  
269 occasional degradations (Figure 7a, b). Adjoint-VP results in a more significant error reduction than adjoint-FD in the  
270 North Atlantic Ocean (Figure 7a, b). In the southern Beaufort Gyre, the Laptev and Kara seas, and north of Svalbard,  
271 both adjoint-VP and adjoint-FD increase the ocean temperature (over 50 m) since the two optimization runs reproduce  
272 the early retreat of sea ice well, allowing more solar heating of the open water. In the North Atlantic Ocean, adjoint-  
273 VP achieves more considerable temperature changes than adjoint-FD both over the top 50m (Figure 7c, d) and from  
274 50m-700m (Figure 7e, f). In the Arctic Ocean, In the layer of 50-700 m, adjoint-VP further introduced negative  
275 temperature corrections between 50-700 m (Figure 7f), especially near the profiles locations (see dots in Figure 7b),  
276 resulting from more iterations performed.

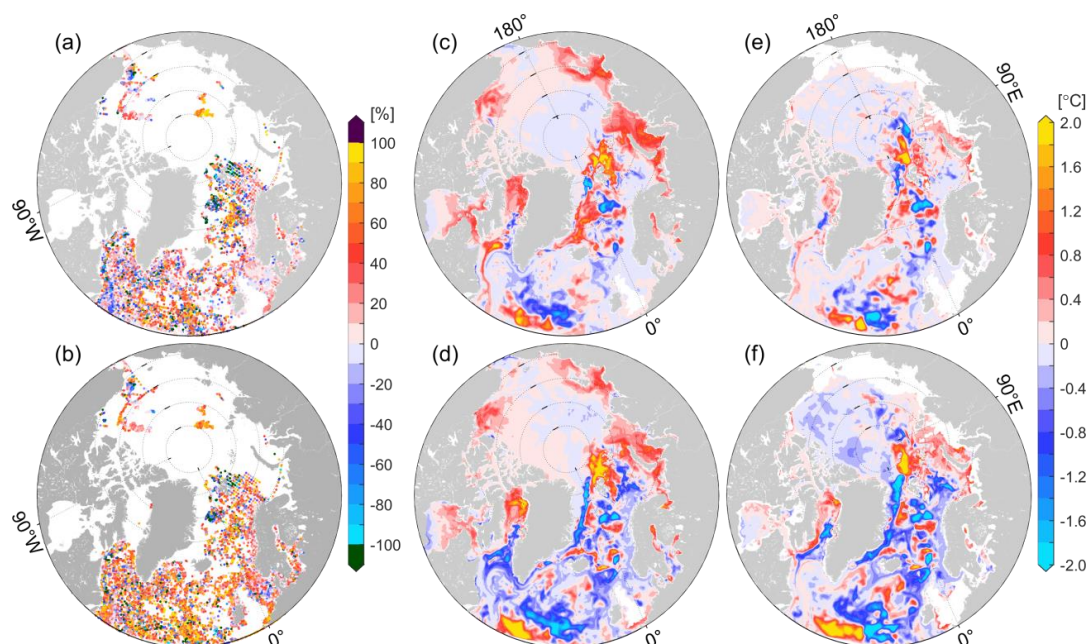

277

278 Figure 7. Relative temperature error reduction ( $-\frac{|T_{opti}-T_{obs}|-|T_{ctrl}-T_{obs}|}{|T_{ctrl}-T_{obs}|} \times 100\%$ ) over the top 50 m at the profile  
 279 locations in (a) adjoint-FD and (b) adjoint-VP. Values >100% means over-adjustment. Panels (c) and (d) are  
 280 temperature differences of adjoint-FD and adjoint-VP to the control run averaged over the top 50m, respectively.  
 281 Panels (e) and (f) are the same as Panels (c) and (d), but for layers 50-700m.  
 282

283 In summary, adjoint-FD and adjoint-VP reproduce the SIC variations well in the Arctic Ocean, which further  
 284 reduces ocean temperature errors over the top layer by improving atmosphere-ocean heat flux. adjoint-VP achieves  
 285 more significant corrections to the ocean temperature over the open water and in the intermediate layer of the Arctic  
 286 Ocean than adjoint-FD.

#### 287 4 Adjustments of the Control Variables

288 The adjoint models project the model-data misfits onto the gradient of the objective function with respect to all  
 289 control variables simultaneously, which is used by the optimization algorithm to adjust the control variables. In this  
 290 section, we compare adjustments of the control variables in the adjoint-FD and adjoint-VP, and evaluate contributions  
 291 of individual adjustments of the control variables on the cost function reduction.

292 Among all the control variables, wind vectors and 2-m air temperature are adjusted considerably in adjoint-FD  
 293 and adjoint-VP, which also show significant differences. Besides, adjoint-VP induce more pronounced adjustments of  
 294 initial temperature and salinity than adjoint-FD (not shown here).  
 295



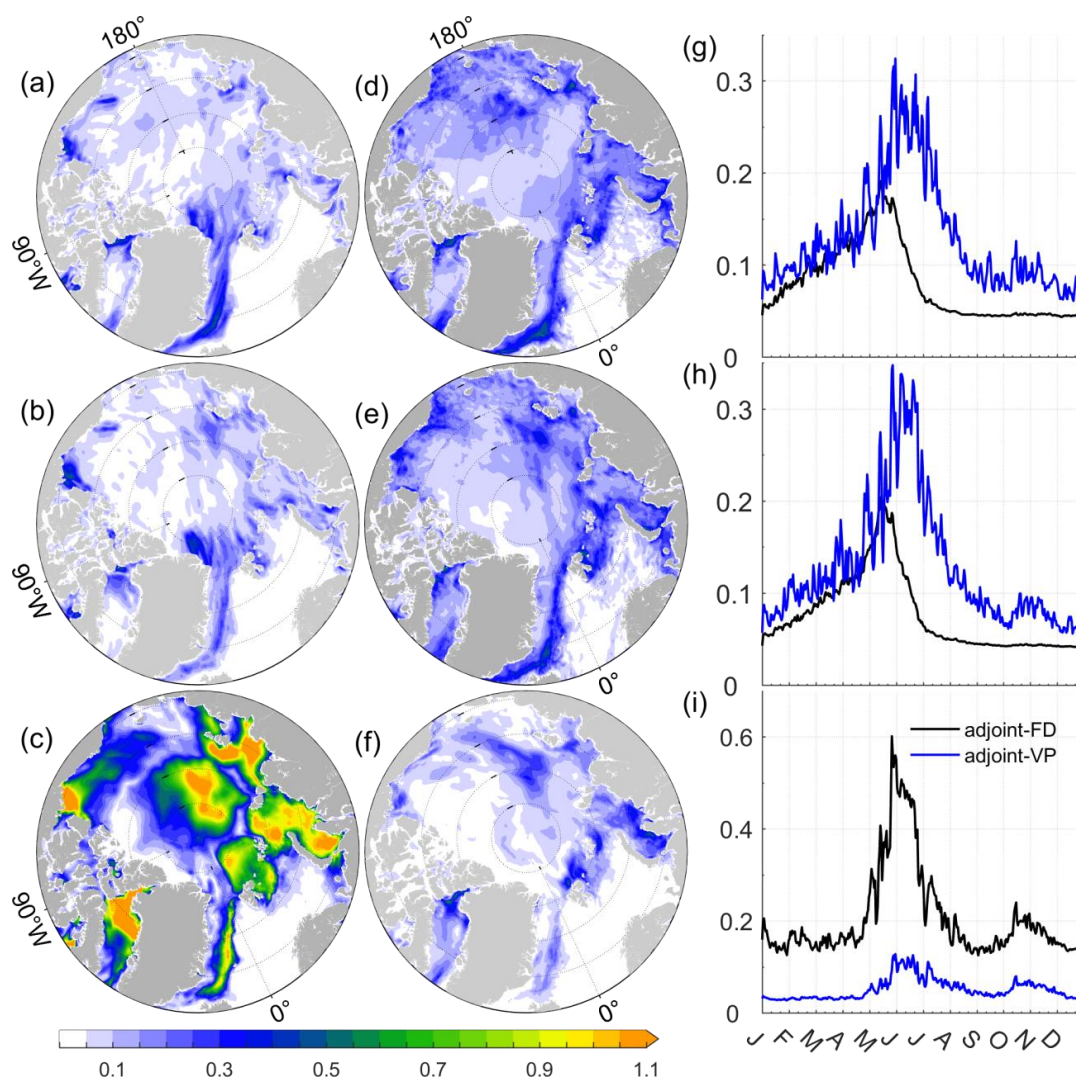

296

297 Figure 8. Adjustments of (a) wind  $u$ -component, (b) wind  $v$ -component, and (c) 2 meter air temperature normalized  
 298 by their prior uncertainties in adjoint-FD and averaged over 2012. Panels (d)-(f) are similar to (a)-(c) but for adjoint-  
 299 VP. Panels (g)-(i) are area average of the adjustments of the wind  $u$ -component, wind  $v$ -component, and 2-m air  
 300 temperature normalized by their prior uncertainties in adjoint-FD and adjoint-VP.

301 Moderate wind vector adjustments (with normalized adjustments of 0.2~0.3) occur over the seasonal ice-covered  
 302 regions (Figure 8a, b, d, and e) with more pronounced adjustments in adjoint-VP (Figure 8d, e) than adjoint-FD (Figure  
 303 8a, b). Besides, maximum adjustments of wind vectors appear in June in adjoint-VP but in May in adjoint-FD (Figure  
 304 8g). adjoint-FD adjusts 2-m air temperature more significantly than adjoint-VP in the Arctic Ocean (Figure 8c, f)  
 305 and throughout 2012 (Figure 8i).

306 In adjoint-FD, the 2-m air temperature adjustments normalized by their prior uncertainties exceed 1.0 over the  
 307 seasonal sea ice-covered regions and the central Arctic Ocean (Figure 8c). While adjoint-VP adjust 2-m air





308 temperature moderately with normalized adjustments of ~0.2-0.3 over the seasonal sea ice-covered regions. The  
 309 maximum adjustments occur in June in the two optimization runs (Figure 8i).

310 **Table 3.** Contributions of adjustments of 2-m air temperature, wind vectors, initial temperature and salinity (Initial T  
 311 &S), and the remaining control variables (including initial sea ice effective thickness and concentration, 2-m specific  
 312 humanity, precipitation, downwelling longwave, and net shortwave radiation) on the total cost reduction, SIC, SST,  
 313 and temperature profiles in the two optimization runs.

|              | Adjoint-FD (%)      |              |               |          | Adjoint-VP (%)      |      |               |          |
|--------------|---------------------|--------------|---------------|----------|---------------------|------|---------------|----------|
|              | 2-m air temperature | Wind vectors | Initial T & S | The rest | 2-m air temperature | wind | Initial T & S | The rest |
| $J_{total}$  | 29.0                | 17.5         | 6.0           | 3.0      | 5.3                 | 52.6 | 25.1          | 5.0      |
| $J_{SIC}$    | 25.5                | 19.8         | 2.4           | 1.2      | 4.5                 | 64.9 | 10.1          | 2.4      |
| $J_{SST}$    | 41.0                | 8.6          | 10.1          | 5.5      | 8.4                 | 47.4 | 29.6          | 6.4      |
| $J_{prof,T}$ | 3.9                 | 4.9          | 4.3           | 4.3      | 4.4                 | 40.9 | 182.0         | 7.9      |

314 By replacing the adjusted initial temperature and salinity, wind vectors, 2-m air temperature, and the remaining  
 315 control variables (including initial sea ice effective thickness and concentration, 2-m specific humanity, precipitation,  
 316 downwelling longwave, and net shortwave radiation) with their original values and estimate their contributions to the  
 317 total cost reductions and individual components, including SIC, SST, and temperature profiles (see Table 3).  
 318

319 The small contributions of adjustments of the remaining control variables (“The rest” in Table 3) variables to the  
 320 cost function reductions in adjoint-FD and adjoint-VP highlight the importance of adjustments on the initial  
 321 temperature and salinity, wind vectors and 2-m air temperature simultaneously. In adjoint-FD, adjustments of 2-m air  
 322 temperature and wind vectors dominate the cost function reduction, especially SIC components. In contrast, adjoint-  
 323 VP rely more on adjustments of wind vectors and initial temperature and salinity. Besides, the more pronounced water  
 324 temperature improvements (see Figure 7) in adjoint-VP are mostly attributed to adjustments of initial temperature and  
 325 salinity (Table 3).

326 Overall, adjoint-FD improves the model simulation through adjusting 2-m air temperature strongly and wind  
 327 vectors moderately. Adjoint-VP adjusts initial conditions, 2-m air temperature, and wind vectors moderately while  
 328 achieving a much larger reduction of the model-data misfits. This leads to the conclusion that the large 2-m air  
 329 temperature adjustments in adjoint-FD are likely an overcompensation for wind errors that could not be corrected  
 330 appropriately because of large errors in the respective cost function gradients.

### 331 5 The Impacts On Sea Ice Retreat Processes

332 A unique characteristic of the adjoint-based synthesis is that its physical processes are described by the governing  
 333 equations of the model, allowing us to quantify the sea ice loss and the contributions of ice dynamics and sea ice-  
 334 ocean-atmosphere fluxes through a closed budget analysis. Since the two optimization runs reproduce the retreat of  
 335 sea ice cover well, we further explore sea-ice effective thickness changes based on the model governing equations:

$$336 \quad H_{Sep} = H_{Apr} + \int (-\nabla \cdot (\bar{u}h) + F_{oi} + F_{ai} + F_{res}) dt \quad (10).$$

337 Ice effective thickness on September 20 ( $H_{Sep}$ ) depends on effective thickness on April 10 ( $H_{Apr}$ ), ice advective  
 338 flux ( $-\nabla \cdot (\bar{u}h)$ ), ocean-sea ice heat flux ( $F_{oi}$ ) depending on ocean temperature difference to freezing temperature  
 339 (Maykut and Mcphee, 1995), atmosphere-sea ice flux ( $F_{ai}$ ) consisting of radiation and turbulence fluxes, and a residual



340 term ( $F_{res}$ ) including a snow flooding effect and a source term to correct negative effective thickness to zero. Since  
 341 contributions of the residual terms are small, we will not show them in the analysis below.

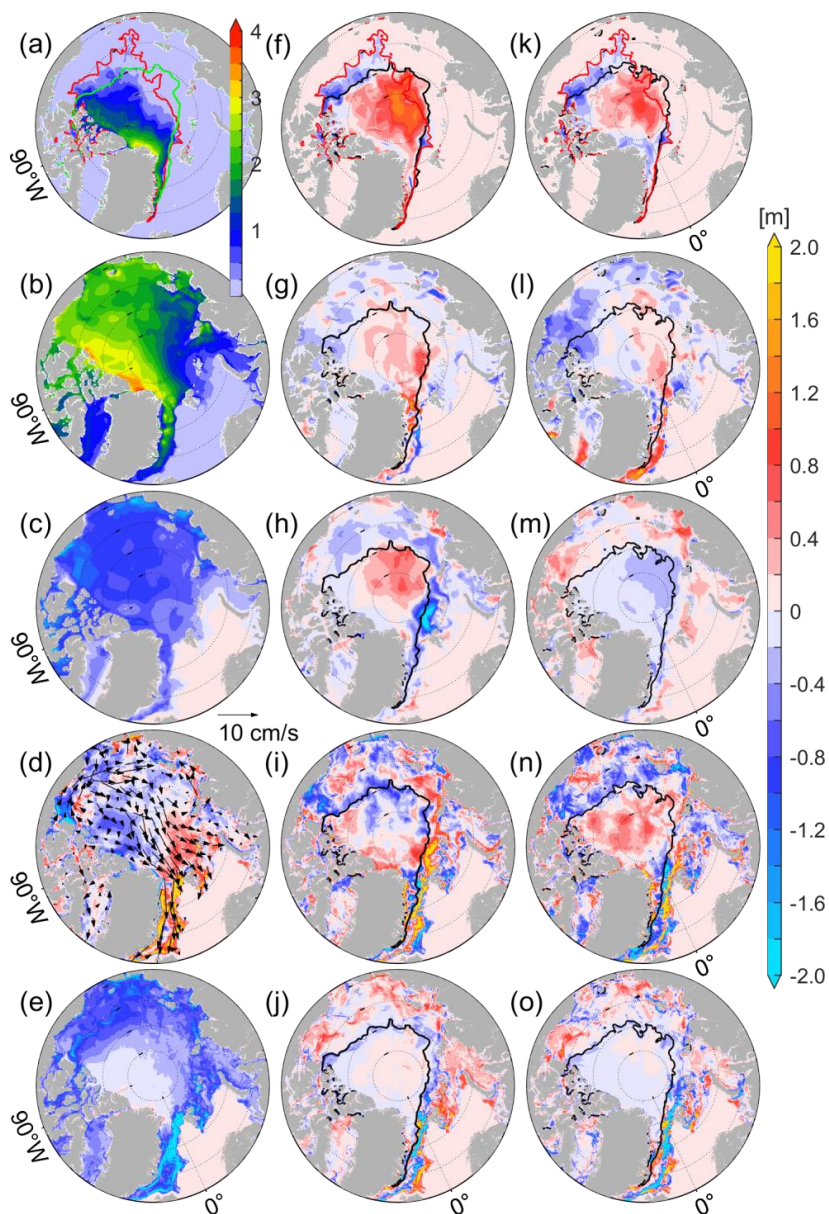

342  
 343  
 344 Figure 9. Sea ice effective thickness on (a) September 20 and (b) April 10, and ice changes due to (c)  $F_{ais}$ , (d)  $F_{adv}$ ,  
 345 and (e)  $F_{oi}$ . Panels (f)-(j) and (k)-(o) are differences in the corresponding terms to the control run for (f-j) adjoint-FD  
 346 and (k)-(o) adjoint-VP, respectively. The green and red lines are the September SIEs from satellite measurement and  
 347 the three runs, respectively.  
 348

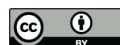

349 In the control run, the September sea ice covers more area than satellite observations in the Pacific sectors and  
350 less area in the eastern Eurasian Basin (red and green lines in Figure 9a). On April 10, effective thickness is up to 1.5  
351 m in the Eurasian Basin and ~2.0-2.5m in the Pacific sectors (Figure 9b). From April 10 to September 20, atmosphere-  
352 sea ice heat flux melts the ice from the top, which is more pronounced in the Pacific sectors (-1.0~-2.0 m) than in the  
353 Eurasian Basin and the central Arctic Ocean (-0.6 m, Figure 9c).  $F_{adv}$  moves ice from the central Arctic Ocean to the  
354 western Eurasian Basin and out through the Fram Strait (Figure 9d), which is then melted by the warm Atlantic water  
355 (Figure 9e). Besides, ocean-sea ice heat flux melts sea ice up to -1.2 m over the seasonal sea ice-covered areas (Figure  
356 9e).

357 Adjoint-FD and adjoint-VP reproduce the observed September SIE very well (black lines in Figure 9f, k). The  
358 two optimization runs remove the extra sea ice the Pacific sectors of the control run in comparison to the satellite  
359 observations (areas enclosed by the red and black lines in Figure 9f, k) through  $F_{adv}$  (Figure 9i, n). At the same time,  
360 in the central Arctic Ocean, adjoint-FD and adjoint-VP thicken the sea ice up to 1.2 and 0.8 m (Figure 9f, k),  
361 respectively.

362 On April 10, adjoint-FD/adjoint-VP show thinner sea ice by -0.2/-0.6 m in the southern Beaufort Gyre and the  
363 marginal seas (Figure 9g, l) and thicker sea ice in the Eurasian Basin and the central Arctic Ocean by 0.4 m. During  
364 the melting season, adjoint-FD and adjoint-VP show differences mainly in  $F_{ai}$  (Figure 9h, m) and  $F_{adv}$  (Figure 9i, n).  
365 In adjoint-FD,  $F_{ai}$  melts more ice in the seasonal sea ice-covered regions (-0.4~-2.0 m) and less ice in the central Arctic  
366 Ocean up to 0.6 m (Figure 9h), contributing to the increased effective thickness in September in the central Arctic  
367 Ocean. In adjoint-VP, the thickened September ice thickness in the central Arctic Ocean is mainly induced by  $F_{adv}$   
368 through ice convergence (Figure 9n). Both adjoint-FD and adjoint-VP enhance ice loss in the marginal seas and the  
369 southern Beaufort Gyre (Figure 9j, o) with similar patterns and amplitudes, reflecting that basal melting is mainly  
370 related to the SIC changes through ice-albedo feedbacks.

371 We note that a much stronger sea ice loss process occurs from May 10 to June 10 in adjoint-FD than in adjoint-  
372 VP, mainly related to surface melting anomalies. During this period, the Arctic Ocean observations rely most on SIC  
373 measurements. Both the two optimization run reproduce the observed SIEs well (green and red lines in Figure 10a, d,  
374 and b, e), with adjoint-VP (Figure 10b) slightly better than adjoint-FD in the Barent and Kara Seas on June 10 (Figure  
375 10e).

376 On May 10, sea ice has been thinned to ~1.0 m between the central Arctic Ocean and the Chukchi Sea (Figure  
377 10a). adjoint-VP shows thinner ice up to -0.6 m than adjoint-FD in the southern Beaufort Gyre, north of Svalbard and  
378 Franz-Josef-Land (Figure 10d).

379 From May 10 to June 10, sea ice is melted in the southeastern Beaufort Gyre, the Laptev Sea, the Kara Sea, and  
380 north of Svalbard and Franz-Josef-Land, creating open water and polynya (Figure 10b, e), with adjoint-FD (Figure  
381 10b) shows much stronger melting than adjoint-VP (Figure 10e). In the Kara and Barents Seas, the intense ice melt in  
382 adjoint-FD leads to a further retreat of SIEs (red line in Figure 10b) compared with observations and adjoint-VP (red  
383 line in Figure 10e) by June 10.

384 In adjoint-FD, surface melting contributes to strong sea ice thinning up to 0.8-2.0 m (shading in Figure 10c),  
385 mainly caused by 2-m air temperature adjustments (contours in Figure 10c). As shown, 2-m air temperature is



386 increased by more than  $8^{\circ}\text{C}$  in the marginal seas (prior air temperature uncertainties are  $\sim 2\text{--}5^{\circ}\text{C}$ ) to facilitate the  
 387 intense surface melting. In the central Arctic Ocean, negative 2-m air temperature adjustments up to  $-6^{\circ}\text{C}$  result in  
 388 little ice melt. In contrast, adjoint-VP shows surface melting of  $-0.4\text{ m}$  with reasonable air temperature adjustments  
 389 ( $< 2^{\circ}\text{C}$ , Figure 10f).

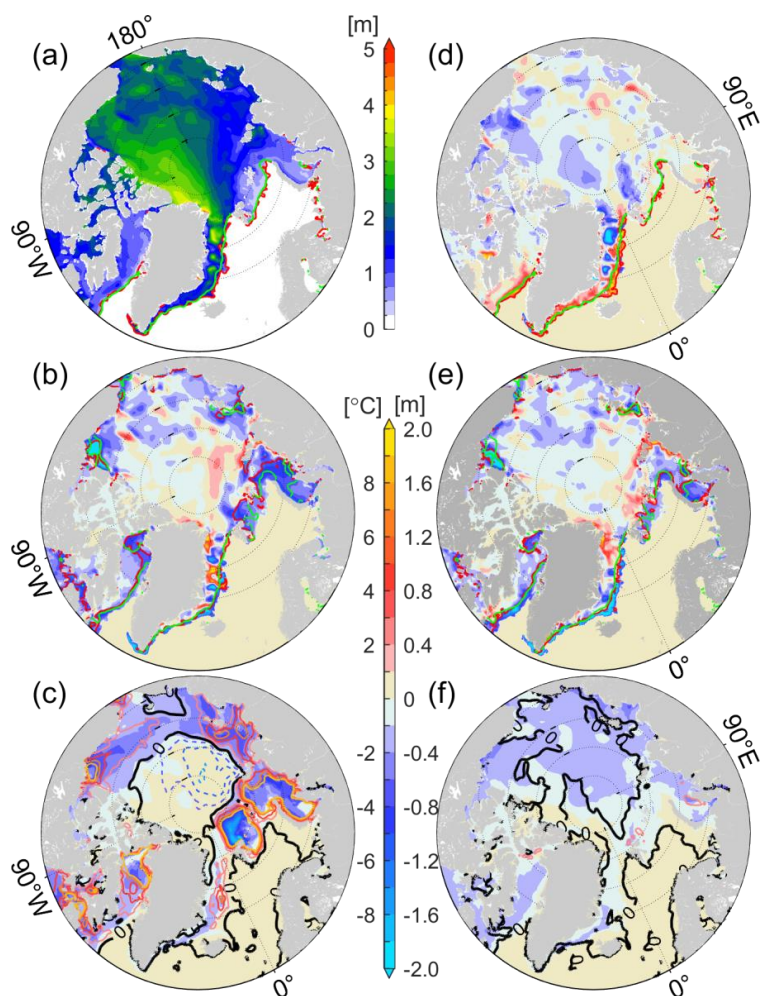

390

391 Figure 10. (a) Sea ice effective thickness on May 10 in adjoint-FD. Panels (b) and (c) are the sea ice effective thickness  
 392 changes and contributions from atmosphere-sea ice heat flux  $\int F_{ai}$  from May 10 to June 10. Panel (d) is sea ice  
 393 effective thickness differences between adjoint-VP and adjoint-FD (adjoint-VP minus adjoint-FD) on May 10. Panels  
 394 (e)-(f) are similar to Panels (b)-(c) but for adjoint-VP. The red and green lines indicate the model-simulated (a-b for  
 395 adjoint-FD; d-e for adjoint-VP) and satellite-observed sea ice extent on (a, d) May 10 and (b, e) June 10. The contours  
 396 in panels (c) and (f) show the adjustments of 2-m air temperature (see the legend for the amplitude).  
 397

398 Overall, the two optimization runs successfully reproduce the sea ice retreat process in 2012 by assimilating  
 399 satellite and in-situ measurements. However, the sea ice retreat processes differ in the two optimized solutions,  
 especially from May to June, when Arctic Ocean observations rely mostly on satellite-measured SIC. Considering the





400 amplitude of air temperature adjustments, the adjustments of the control variables in adjoint-VP are more reasonable  
401 than adjoint-FD, and adjoint-VP seems to project model-data misfits to the control variables more reasonably than  
402 adjoint-FD.

## 403 **6 Conclusions**

404 The adjoint model is a powerful way to calculate sensitivities of a target function to model variables and has been  
405 applied to the coupled Arctic ocean and sea ice models for sensitivity studies (Heimbach et al., 2010; Kauker et al.,  
406 2009; Koldunov et al., 2013) and state estimate (Fenty and Heimbach, 2013; Koldunov et al., 2017; Lyu et al., 2021b;  
407 Nguyen et al., 2021). However, due to the persistent instability issues, traditionally the adjoint of sea ice dynamics  
408 was excluded or simplified to the adjoint of a free-drift sea ice model, which potentially hampers the accuracy of the  
409 coupled ocean and sea ice estimation.

410 Based on the study of Toyoda et al. (2019) and the coupled ocean-sea ice modeling and adjoint assimilation  
411 system (Lyu et al., 2021a), we stabilize the adjoint of a viscous-plastic sea ice dynamic model and test the impacts of  
412 including the rheology on estimating the spatio-temporal variations of Arctic ocean and sea ice state.

413 Two optimizations with included and excluded rheology were performed and both show reduced SIC and SIT  
414 errors and both reproduce the sea ice retreat well. With the improved SIC retreat processes, adjoint-FD and adjoint-  
415 VP also show similar ocean temperature changes in the marginal seas and the southern Beaufort Gyre since solar  
416 radiation heats the open water quickly as the sea ice retreats. With the improved adjoint of sea ice dynamics, adjoint-  
417 VP allows much stronger adjustments of the initial temperature, resulting in a much more significant improvement in  
418 the temperature in the North Atlantic Ocean and the intermediate layer (50-700 m) of the Arctic Ocean.

419 Despite that adjoint-FD compute much stronger sensitivities of the cost function to the wind vectors than adjoint-  
420 VP, we note that adjoint-FD adjusts more (less) on 2-m air temperature (wind vectors) than adjoint-VP. It seems that  
421 adjoint sensitivities of wind vectors in adjoint-FD is less efficient to reduce the cost function than adjoint-VP during  
422 the optimization. And adjoint-FD adjusts 2-m air temperature strongly to reduce the model-data misfits while adjoint-  
423 VP adjusts all the control variables considerably to improve the model simulation.

424 Using a sea ice budget analysis, we further examine the sea ice retreat processes in adjoint-FD and adjoint-VP.  
425 The control run simulates extra ice in the Pacific sector on 20. September, which is removed through ice advective  
426 flux in the optimization runs. At the same time, sea ice in the central Arctic Ocean is thickened compared with the  
427 control run caused by reduced surface melting in adjoint-FD and ice convergence in adjoint-VP. We note that adjoint-  
428 FD and adjoint-VP show different ice thinning processes from May 10 to June 10 and in the marginal seas. Adjoint-  
429 FD showed thicker ice in the marginal seas than adjoint-VP, which is melted by increasing the air temperature  
430 enormously (up to 8° C). In adjoint-VP, sea ice thinning is moderate with more reasonable adjustments of air  
431 temperature. Therefore, the improvement of the adjoint model in adjoint-VP maps the model-data misfits better to the  
432 control variables than adjoint-FD.

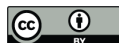

433 Parameter uncertainties significantly impact ocean and sea ice simulations (Lu et al., 2021; Massonnet et al.,  
434 2014; Sumata et al., 2019), and a lack of direct observations of key parameters potentially result in biases in the model  
435 simulation and predictions. The development of the adjoint of the viscous-plastic sea ice dynamics further introduces  
436 three parameters, including ice compressive strength constant ( $P^*$ ), ice strength decay constant ( $C^*$ ), and ration of  
437 normal stress to shear stress ( $e$ ), into the adjoint model. Sensitivities of the model uncertain parameters could be  
438 calculated with the adjoint of the coupled ocean-sea ice model, providing chances to further improve ocean-sea ice  
439 estimates through jointly estimating state and parameters.

#### 440 **7 Data availability**

441 The data used to create the plots in the paper are available at Pangaea (<https://issues.pangaea.de/browse/PDI-33039>).  
442 Assimilated observations are listed in Table 1; and the up-looking sonar observed sea ice draft are from the Beaufort  
443 Gyre Exploration Project (BGEP, <https://www2.who.edu/site/beaufortgyre/>).

444

445 *Author contribution.* G. Lyu designed the experiments, conducted the experiments and analysis. A. Koehl contributed  
446 to the experiment design and interpretations. G. Lyu wrote the first draft. A. Koehl, D. Stammer, X. Wu, and M. Zhou  
447 contributed to reviewing and editing the manuscript.

448

449 *Competing interests.* The authors declare that they have no conflict of interest.

450

#### 451 **Acknowledgments**

452 This work was funded partly by the Open Fund Project of Key Laboratory of Marine Environmental Information  
453 Technology, Ministry of Natural Resources of the People's Republic of China to G. Lyu and by the Shanghai Frontiers  
454 Science Center of Polar Science (SCOPS) to M. Zhou. We thank NCEP for offering the NCEP/NCAR-RA1 reanalysis.  
455 Thanks to ICDC at University of Hamburg and Alfred Wegener Institute for supplying the ASI-SSM/I sea ice  
456 concentration and CryoSat-2/SMOS L4 datasets. We also acknowledge the Met Office, the Copernicus Marine Service,  
457 and the Beaufort Gyre Exploration Project for archiving and sharing the EN4, the along-track SLA, and sea ice draft  
458 datasets used in assimilation and independent validation.

459

#### 460 **References**

461 AMAP, Arctic Climate Change Update 2021: Key Trends and Impacts. Summary for Policy-makers. Arctic  
462 Monitoring and Assessment Programme (AMAP), Tromsø Norway. 16 pp, 2021.  
463 Buckley, M. W., Ponte, R. M., Forget, G., and Heimbach, P.: Low-Frequency SST and Upper-Ocean Heat Content  
464 Variability in the North Atlantic, *Journal of Climate*, 27, 4996-5018, 10.1175/jcli-d-13-00316.1, 2014.  
465 Chevallier, M., Smith, G. C., Dupont, F., Lemieux, J.-F., Forget, G., Fujii, Y., Hernandez, F., Msadek, R., Peterson,  
466 K. A., Storto, A., Toyoda, T., Valdivieso, M., Vernieres, G., Zuo, H., Balmaseda, M., Chang, Y.-S., Ferry, N.,  
467 Garric, G., Haines, K., Keeley, S., Kovach, R. M., Kuragano, T., Masina, S., Tang, Y., Tsujino, H., and Wang, X.:



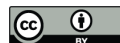

- 468 Intercomparison of the Arctic sea ice cover in global ocean–sea ice reanalyses from the ORA-IP project, *Climate*  
469 *Dynamics*, 49, 1107–1136, 10.1007/s00382-016-2985-y, 2017.
- 470 Comiso, J. C., Parkinson, C. L., Gersten, R., and Stock, L.: Accelerated decline in the Arctic sea ice cover,  
471 *Geophysical Research Letters*, 35, 10.1029/2007gl031972, 2008.
- 472 Fekete, B. M., Vörösmarty, C. J., and Grabs, W.: High-resolution fields of global runoff combining observed river  
473 discharge and simulated water balances, *Global Biogeochemical Cycles*, 16, 15–11–15–10,  
474 <https://doi.org/10.1029/1999GB001254>, 2002.
- 475 Fenty, I. and Heimbach, P.: Coupled Sea Ice–Ocean–State Estimation in the Labrador Sea and Baffin Bay, *Journal of*  
476 *Physical Oceanography*, 43, 884–904, 10.1175/jpo-d-12-065.1, 2013.
- 477 Forget, G., Campin, J. M., Heimbach, P., Hill, C. N., Ponte, R. M., and Wunsch, C.: ECCO version 4: an integrated  
478 framework for non-linear inverse modeling and global ocean state estimation, *Geoscientific Model Development*, 8,  
479 3071, 2015.
- 480 Giering, R. and Kaminski, T.: Recipes for adjoint code construction, *ACM Transactions on Mathematical Software*  
481 *(TOMS)*, 24, 437–474, 1998.
- 482 Gilbert, J. C. and Lamaréchal, C.: The module MIQN3, 2006.
- 483 Good, S. A., Martin, M. J., and Rayner, N. A.: EN4: Quality controlled ocean temperature and salinity profiles and  
484 monthly objective analyses with uncertainty estimates, *Journal of Geophysical Research: Oceans*, 118, 6704–6716,  
485 10.1002/2013jc009067, 2013.
- 486 Heimbach, P., Menemenlis, D., Losch, M., Campin, J.-M., and Hill, C.: On the formulation of sea-ice models. Part  
487 2: Lessons from multi-year adjoint sea-ice export sensitivities through the Canadian Arctic Archipelago, *Ocean*  
488 *Modelling*, 33, 145–158, <https://doi.org/10.1016/j.ocemod.2010.02.002>, 2010.
- 489 Heimbach, P., Fukumori, I., Hill, C. N., Ponte, R. M., Stammer, D., Wunsch, C., Campin, J.-M., Cornuelle, B.,  
490 Fenty, I., Forget, G., Kohl, A., Mazloff, M., Menemenlis, D., Nguyen, A. T., Piecuch, C., Trossman, D., Verdy, A.,  
491 Wang, O., and Zhang, H.: Putting It All Together: Adding Value to the Global Ocean and Climate Observing  
492 Systems With Complete Self-Consistent Ocean State and Parameter Estimates, *Frontiers in Marine Science*, 6,  
493 10.3389/fmars.2019.00055, 2019.
- 494 Hibler, W.: A Dynamic Thermodynamic Sea Ice Model, *Journal of Physical Oceanography*, 9, 815–846,  
495 10.1175/1520-0485(1979)009<0815:adtsim>2.0.co;2, 1979.
- 496 Kaleschke, L., Lüpkes, C., Vihma, T., Haarpaintner, J., Bocher, A., Hartmann, J., and Heygster, G.: SSM/I Sea Ice  
497 Remote Sensing for Mesoscale Ocean–Atmosphere Interaction Analysis, *Canadian Journal of Remote Sensing*, 27,  
498 526–537, 10.1080/07038992.2001.10854892, 2001.
- 499 Kalnay, E., Kanamitsu, M., Kistler, R., Collins, W., Deaven, D., Gandin, L., Iredell, M., Saha, S., White, G.,  
500 Woollen, J., Zhu, Y., Chelliah, M., Ebisuzaki, W., Higgins, W., Janowiak, J., Mo, K. C., Ropelewski, C., Wang, J.,  
501 Leetmaa, A., Reynolds, R., Jenne, R., and Joseph, D.: The NCEP/NCAR 40-Year Reanalysis Project, *Bulletin of the*  
502 *American Meteorological Society*, 77, 437–472, 10.1175/1520-0477(1996)077<0437:tnyrp>2.0.co;2, 1996.
- 503 Kauker, F., Kaminski, T., Karcher, M., Giering, R., Gerdes, R., and Voßbeck, M.: Adjoint analysis of the 2007 all  
504 time Arctic sea-ice minimum, *Geophysical Research Letters*, 36, 10.1029/2008gl036323, 2009.
- 505 Koldunov, N. V., Kohl, A., and Stammer, D.: Properties of adjoint sea ice sensitivities to atmospheric forcing and  
506 implications for the causes of the long term trend of Arctic sea ice, *Climate dynamics*, 41, 227–241, 2013.
- 507 Koldunov, N. V., Kohl, A., Serra, N., and Stammer, D.: Sea ice assimilation into a coupled ocean–sea ice model  
508 using its adjoint, *The Cryosphere*, 11, 2265–2281, 10.5194/tc-11-2265-2017, 2017.
- 509 Kwok, R.: Arctic sea ice thickness, volume, and multiyear ice coverage: losses and coupled variability (1958–2018),  
510 *Environmental Research Letters*, 13, 105005, 10.1088/1748-9326/aae3ec, 2018.
- 511 Large, W. G., McWilliams, J. C., and Doney, S. C.: Oceanic vertical mixing: A review and a model with a nonlocal  
512 boundary layer parameterization, *Reviews of Geophysics*, 32, 363–403, 1994.
- 513 Lavergne, T., Sørensen, A. M., Kern, S., Tonboe, R., Notz, D., Aaboe, S., Bell, L., Dybkjær, G., Eastwood, S.,  
514 Gabarro, C., Heygster, G., Killie, M. A., Brandt Kreiner, M., Lavelle, J., Saldo, R., Sandven, S., and Pedersen, L. T.:  
515 Version 2 of the EUMETSAT OSI SAF and ESA CCI sea-ice concentration climate data records, *The Cryosphere*,  
516 13, 49–78, 10.5194/tc-13-49-2019, 2019.
- 517 Losch, M., Menemenlis, D., Campin, J.-M., Heimbach, P., and Hill, C.: On the formulation of sea-ice models. Part  
518 1: Effects of different solver implementations and parameterizations, *Ocean Modelling*, 33, 129–144, 2010.
- 519 Lyu, G., Koehl, A., Serra, N., and Stammer, D.: Assessing the current and future Arctic Ocean observing system  
520 with observing system simulating experiments, *Quarterly Journal of the Royal Meteorological Society*, 147, 2670–  
521 2690, <https://doi.org/10.1002/qj.4044>, 2021a.

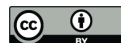

- 522 Lyu, G., Koehl, A., Serra, N., Stammer, D., and Xie, J.: Arctic ocean–sea ice reanalysis for the period 2007–2016  
523 using the adjoint method, *Quarterly Journal of the Royal Meteorological Society*, 147, 1908–1929,  
524 <https://doi.org/10.1002/qj.4002>, 2021b.
- 525 Ma, X., Mu, M., Dai, G., Han, Z., Li, C., and Jiang, Z.: Influence of Arctic Sea Ice Concentration on Extended-  
526 Range Prediction of Strong and Long-Lasting Ural Blocking Events in Winter, *Journal of Geophysical Research:*  
527 *Atmospheres*, 127, e2021JD036282, <https://doi.org/10.1029/2021JD036282>, 2022.
- 528 Marshall, J., Adcroft, A., Hill, C., Perelman, L., and Heisey, C.: A finite - volume, incompressible Navier Stokes  
529 model for studies of the ocean on parallel computers, *Journal of Geophysical Research: Oceans*, 102, 5753–5766,  
530 1997.
- 531 Maykut, G. A. and McPhee, M. G.: Solar heating of the Arctic mixed layer, *Journal of Geophysical Research:*  
532 *Oceans*, 100, 24691–24703, 10.1029/95jc02554, 1995.
- 533 Mazloff, M. R., Heimbach, P., and Wunsch, C.: An Eddy-Permitting Southern Ocean State Estimate, *Journal of*  
534 *Physical Oceanography*, 40, 880–899, 10.1175/2009jpo4236.1, 2010.
- 535 Morison, J., Wahr, J., Kwok, R., and Peralta - Ferriz, C.: Recent trends in Arctic Ocean mass distribution revealed  
536 by GRACE, *Geophysical Research Letters*, 34, 2007.
- 537 Nguyen, A. T., Pillar, H., Ocaña, V., Bigdeli, A., Smith, T. A., and Heimbach, P.: The Arctic Subpolar Gyre sTate  
538 Estimate: Description and Assessment of a Data-Constrained, Dynamically Consistent Ocean-Sea Ice Estimate for  
539 2002–2017, *Journal of Advances in Modeling Earth Systems*, 13, e2020MS002398,  
540 <https://doi.org/10.1029/2020MS002398>, 2021.
- 541 Overland, J. E., Ballinger, T. J., Cohen, J., Francis, J. A., Hanna, E., Jaiser, R., Kim, B. M., Kim, S. J., Ukita, J.,  
542 Vihma, T., Wang, M., and Zhang, X.: How do intermittency and simultaneous processes obfuscate the Arctic  
543 influence on midlatitude winter extreme weather events?, *Environmental Research Letters*, 16, 043002,  
544 10.1088/1748-9326/abdb5d, 2021.
- 545 Piecuch, C. G. and Ponte, R. M.: Importance of Circulation Changes to Atlantic Heat Storage Rates on Seasonal and  
546 Interannual Time Scales, *Journal of Climate*, 25, 350–362, 10.1175/jcli-d-11-00123.1, 2012.
- 547 Polyakov, I. V., Pnyushkov, A. V., Alkire, M. B., Ashik, I. M., Baumann, T. M., Carmack, E. C., Goszczko, I.,  
548 Guthrie, J., Ivanov, V. V., Kanzow, T., Krishfield, R., Kwok, R., Sundfjord, A., Morison, J., Rember, R., and Yulin,  
549 A.: Greater role for Atlantic inflows on sea-ice loss in the Eurasian Basin of the Arctic Ocean, *Science*, 356, 285–  
550 291, 10.1126/science.aai8204, 2017.
- 551 Proshutinsky, A., Krishfield, R., Timmermans, M.-L., Toole, J., Carmack, E., McLaughlin, F., Williams, W. J.,  
552 Zimmermann, S., Itoh, M., and Shimada, K.: Beaufort Gyre freshwater reservoir: State and variability from  
553 observations, *Journal of Geophysical Research: Oceans*, 114, 10.1029/2008jc005104, 2009.
- 554 Proshutinsky, A., Krishfield, R., Toole, J. M., Timmermans, M.-L., Williams, W., Zimmermann, S., Yamamoto-  
555 Kawai, M., Armitage, T. W. K., Dukhovskoy, D., Golubeva, E., Manucharyan, G. E., Platov, G., Watanabe, E.,  
556 Kikuchi, T., Nishino, S., Itoh, M., Kang, S.-H., Cho, K.-H., Tateyama, K., and Zhao, J.: Analysis of the Beaufort  
557 Gyre Freshwater Content in 2003–2018, *Journal of Geophysical Research: Oceans*, 124, 9658–9689,  
558 10.1029/2019jc015281, 2019.
- 559 Quadfasel, D., SY, A., WELLS, D., and TUNIK, A.: Warming in the Arctic, *Nature*, 350, 385, 1991.
- 560 Ricker, R., Hendricks, S., Kaleschke, L., Tian-Kunze, X., King, J., and Haas, C.: A weekly Arctic sea-ice thickness  
561 data record from merged CryoSat-2 and SMOS satellite data, *The Cryosphere*, 11, 1607–1623, 10.5194/tc-11-1607-  
562 2017, 2017.
- 563 Schauer, U., Beszczynska-Möller, A., Walczowski, W., Fahrbach, E., Piechura, J., and Hansen, E.: Variation of  
564 measured heat flow through the Fram Strait between 1997 and 2006, in: *Arctic–Subarctic Ocean Fluxes*, Springer,  
565 65–85, 2008.
- 566 Serra, N., Käse, R. H., Köhl, A., Stammer, D., and Quadfasel, D.: On the low-frequency phase relation between the  
567 Denmark Strait and the Faroe-Bank Channel overflows, *Tellus A: Dynamic Meteorology and Oceanography*, 62,  
568 530–550, 10.1111/j.1600-0870.2009.00445.x, 2010.
- 569 Smith, W. H. F. and Sandwell, D. T.: Global Sea Floor Topography from Satellite Altimetry and Ship Depth  
570 Soundings, *Science*, 277, 1956–1962, 10.1126/science.277.5334.1956, 1997.
- 571 Spreen, G., Kaleschke, L., and Heygster, G.: Sea ice remote sensing using AMSR-E 89-GHz channels, *Journal of*  
572 *Geophysical Research: Oceans*, 113, 10.1029/2005jc003384, 2008.
- 573 Stammer, D., Wunsch, C., Giering, R., Eckert, C., Heimbach, P., Marotzke, J., Adcroft, A., Hill, C. N., and  
574 Marshall, J.: Global ocean circulation during 1992–1997, estimated from ocean observations and a general  
575 circulation model, *Journal of Geophysical Research: Oceans*, 107, 1-1-1-27, <https://doi.org/10.1029/2001JC000888>,  
576 2002.



577 Tilling, R. L., Ridout, A., and Shepherd, A.: Estimating Arctic sea ice thickness and volume using CryoSat-2 radar  
578 altimeter data, *Advances in Space Research*, 62, 1203-1225, <https://doi.org/10.1016/j.asr.2017.10.051>, 2018.

579 Toole, J.M., Krishfield, R., Woods Hole Oceanographic Institution Ice-Tethered Profiler Program, Ice-Tethered  
580 Profiler observations: Vertical profiles of temperature, salinity, oxygen, and ocean velocity from an Ice-Tethered  
581 Profiler buoy system. NOAA National Centers for Environmental Information. Dataset.  
582 <https://doi.org/10.7289/v5mw2f7x>, 2016.

583 Toyoda, T., Hirose, N., Urakawa, L. S., Tsujino, H., Nakano, H., Usui, N., Fujii, Y., Sakamoto, K., and Yamanaka,  
584 G.: Effects of Inclusion of Adjoint Sea Ice Rheology on Backward Sensitivity Evolution Examined Using an Adjoint  
585 Ocean–Sea Ice Model, *Monthly Weather Review*, 147, 2145-2162, 10.1175/mwr-d-18-0198.1, 2019.

586 Uotila, P., Goosse, H., Haines, K., Chevallier, M., Barthélemy, A., Bricaud, C., Carton, J., Fučkar, N., Garric, G.,  
587 Iovino, D., Kauker, F., Korhonen, M., Lien, V. S., Marnela, M., Massonnet, F., Mignac, D., Peterson, K. A.,  
588 Sadikni, R., Shi, L., Tietsche, S., Toyoda, T., Xie, J., and Zhang, Z.: An assessment of ten ocean reanalyses in the  
589 polar regions, *Climate Dynamics*, 52, 1613-1650, 10.1007/s00382-018-4242-z, 2019.

590 Woodgate, R. A., Weingartner, T. J., and Lindsay, R.: Observed increases in Bering Strait oceanic fluxes from the  
591 Pacific to the Arctic from 2001 to 2011 and their impacts on the Arctic Ocean water column, *Geophysical Research*  
592 *Letters*, 39, 2012.

593 Wunsch, C. and Heimbach, P.: Practical global oceanic state estimation, *Physica D: Nonlinear Phenomena*, 230,  
594 197-208, <https://doi.org/10.1016/j.physd.2006.09.040>, 2007.

595 Yang, C.-Y., Liu, J., and Xu, S.: Seasonal Arctic Sea Ice Prediction Using a Newly Developed Fully Coupled  
596 Regional Model With the Assimilation of Satellite Sea Ice Observations, *Journal of Advances in Modeling Earth*  
597 *Systems*, 12, e2019MS001938, <https://doi.org/10.1029/2019MS001938>, 2020.

598 Zhang, J. and Hibler III, W.: On an efficient numerical method for modeling sea ice dynamics, *Journal of*  
599 *Geophysical Research: Oceans*, 102, 8691-8702, 1997.

600 Zhang, J. and Rothrock, D. A.: Modeling Arctic sea ice with an efficient plastic solution, *Journal of Geophysical*  
601 *Research: Oceans*, 105, 3325-3338, 2000.

602 Zweng, M. M., Reagan, J. R., Seidov, D., Boyer, T. P., Locarnini, R. A., Garcia, H. E., Mishonov, A. V., Baranova,  
603 O. K., Weathers, K. W., Paver, C. R., and V. S. I.: *World Ocean Atlas 2018, Volume 2: Salinity S*, Levitus, edited  
604 by: Mishonov, A., NOAA Atlas NESDIS, 82, 50, 2018.

605
